# Supplementary material for: Multi-omics integration analysis identifies novel genes for alcoholism with potential overlap with neurodegenerative diseases
Source: PubMed Central journal article supplement (PMC8379159; doi:10.1038/s41467-021-25392-y), 2021-08-20
Supplement: 41467_2021_25392_MOESM3_ESM.pdf [file 41467_2021_25392_MOESM3_ESM.pdf]

1 Description of Additional Supplementary files  
2  
3 Title: Supplementary Data 1  
4 Description: Brain eQTL and mQTL datasets used for SMR analysis  
5  
6 Title: Supplementary Data 2  
7 Description: LDSC analysis of AUD GWAS with multi-tissue chromatin marks  
8  
9 Title: Supplementary Data 3  
10 Description: LDSC analysis of DPW GWAS with multi-tissue chromatin marks  
11  
12 Title: Supplementary Data 4  
13 Description: SMR analysis results with summary statistics of AUD GWAS (No GWAS P value  
14 threshold)  
15  
16 Title: Supplementary Data 5  
17 Description: SMR analysis results with summary statistics of DPW GWAS (With GWAS P  
18 value threshold)  
19  
20 Title: Supplementary Data 6  
21 Description: SMR analysis results with summary statistics of DPW GWAS (No GWAS P value  
22 threshold)  
23  
24 Title: Supplementary Data 7  
25 Description: AUD genes that also replicated in DPW SMR analysis  
26  
27 Title: Supplementary Data 8  
28 Description: Results of pathway analysis with genes prioritized in DPW integration analysis  
29  
30 Title: Supplementary Data 9  
31 Description: SMR analysis using summary statistics of AUD and DPW meta-analysis using  
32 MTAG
